# Supplementary material for: SUMOylation of the m6A-RNA methyltransferase METTL3 modulates its function
Source: PubMed Central journal article supplement — Nucleic Acids Res. 2018 Feb 28;46(10):5195–208. doi: 10.1093/nar/gky156 (PMC6007514; doi:10.1093/nar/gky156), 2018-02-28
Supplement: gky156_supp.pdf [file gky156_supp.pdf]

## SUPPLEMENTARY FIGURE and TABLE LEGENDS

**Figure S1.** Knockdown efficiency of Ubc9 or Senp1 in HeLa cells was determined by Western Blotting.

**Figure S2.** (A) SUMOplot prediction of human METTL3 protein. SUMOylation of human METTL3 protein was predicted by the program of Abgent SUMOplot (<http://www.abgent.com/SUMOplot> ). (B) HA-METTL3-WT and HA-METTL3-4KR with or without His-SUMO1/Flag-Ubc9 were co-transfected into 293T cells. Forty-eight hours after transfection, cell lysates were prepared for Ni<sup>2+</sup>-NTA pull down, followed by Western blotting analysis with anti-HA and anti-METTL3 antibodies. (C) Amino acid sequence alignment of METTL3 sequences from different species as indicated. The conserved lysines are shown in red.

**Figure S3.** (A) HA-METTL3 with or without His-SUMO1/Flag-Ubc9 and EBG-Senp1 were co-transfected into 293T cells. 48 hrs after transfection, cells were lysed for immunoblotting with indicated antibodies. (B) METTL14 is not be SUMOylated in 293T cells. Flag-METTL14 with or without His-SUMO1, Flag-Ubc9 and EBG-Senp1 were transfected into 293T cells and the SUMOylation assay was performed with the method of Ni<sup>2+</sup>-NTA resin pull down. (C) HA-METTL3-WT or HA-METTL3-4KR was transfected into 293T-shSenp1 cells respectively. 48 hrs after transfection, cells were lysed in RIPA buffer and immunoprecipitated with anti-HA

antibody, followed by Western blotting with anti-CBP80, anti-eIF4E and anti-eIF3b. One-tenth of lysates as input were immunoblotted with indicated antibodies.

**Figure S4.** Representative LC-MS/MS spectra and the standard curve for m<sup>6</sup>A and A. (A) The A and m<sup>6</sup>A standard curve was obtained from four standard samples with different amounts of A and pure m<sup>6</sup>A, respectively. (B, C) On a LC-MS/MS system, the quantities of nucleotides in H1299-shMETTL3-METTL3-WT (B) and H1299-shMETTL3-METTL3-4KR (C) cells were quantified by its integration area in the corresponding chromatogram.

**Figure S5.** *In vitro* methylation activity assay of METTL3. (A) schematic diagram of RNA probes Seq1 and Seq2 for the *in vitro* methylation activity assay; (B-C) Purified METTL3/METTL14 complexes with or without the RNA probe Seq1 with the consensus sequence of 'GGACU' (B) or the RNA probe Seq2 with the point mutation sequence of 'GGAUU' (C) were subjected to *in vitro* methylation activity assay. The methylation of RNA-probe was measured by immunoblotting with the m<sup>6</sup>A antibody.

**Table S1.** Summary of the MeRIP m<sup>6</sup>A-seq and RNA-seq.

**Table S2.** List of 90 genes that exhibit a significant change between METTL3-WT and METTL3-4KR in both in m<sup>6</sup>A peak levels and abundance of the corresponding mRNA transcripts.

Figure S1

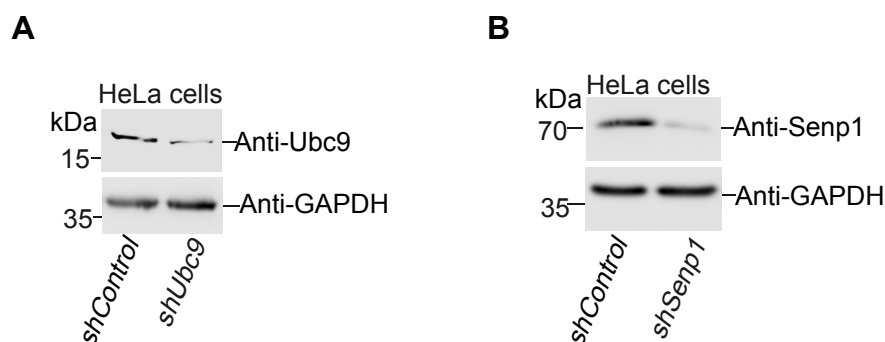

Figure S2

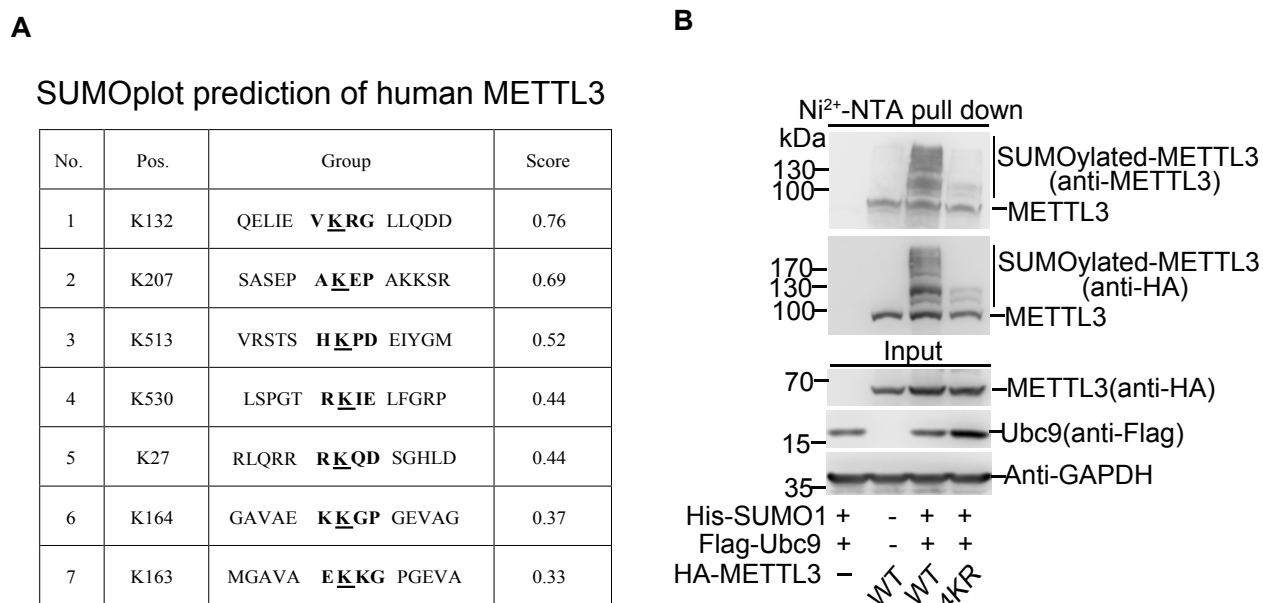

C

Homo sapiens 170AGTVTGQKRRAEQDSTTVAAFASSLVSGLNSSASEPAKEPAKKSRKHAASD<sup>220</sup>

Mouse 170AGT IAGQKRRAEQDLTTVTTFASSLASG LASSASEPAKEPAKKSRKHAASD<sup>220</sup>

Rattus norvegicus 170AGT ITGQKRRAEQD ITTVATFTSSLASG LGSSTSEPAKEPAKKSRKHAASD<sup>220</sup>

Bos taurus 170AGT IAGQKRRAEQDSTTAAFTSSLASG LASSASEVAKEPTKKSRKHAASD<sup>220</sup>

Danio rerio 162ADD ITHQKRAPGSSPSIQA....LATASISQLTASSGGGGGGADKK.....KVQASH<sup>225</sup>

Pan troglodytes 170AGTVTGQKRRAEQDSTTVAAFASSLVSG LNSSASEPAKEPAKKSRKHAASD<sup>220</sup>

Xenopus tropicalis 168AG.....AKKRRLQEADPSASSLSSS.....SSASASGEKKASEPQKKARKNA..SH<sup>213</sup>

Macaca mulatta 170AGTVTGQKRRAEQDSTTVAAFASSLA SG LSSASEPAKEPAKKSRKHAASD<sup>220</sup>

capra hircus 170AGT IAGQKRRA EQDSTTAAFTSSLASG LASSTSEVAKEPTKKSRKHAASD<sup>220</sup>

**A**

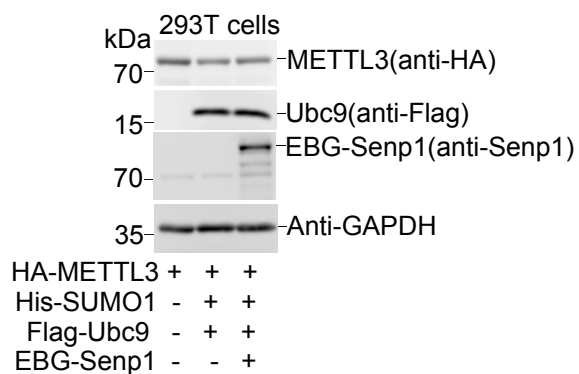

**B**

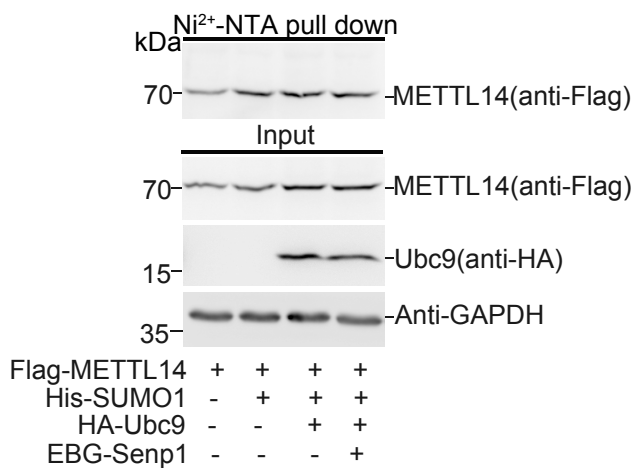

**C**

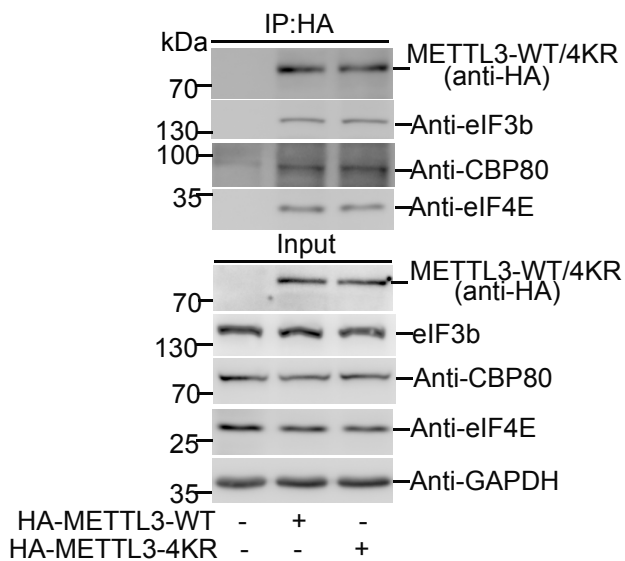

**A****Figure S4**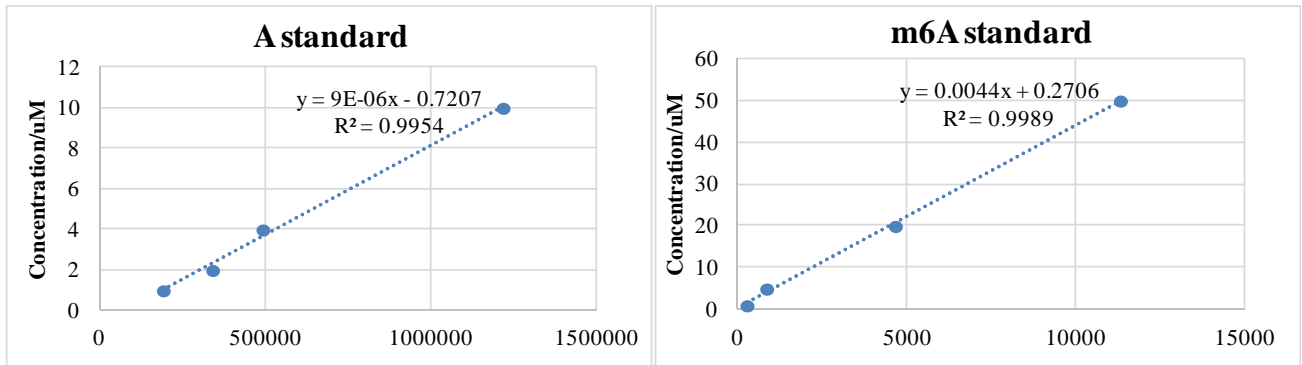**B**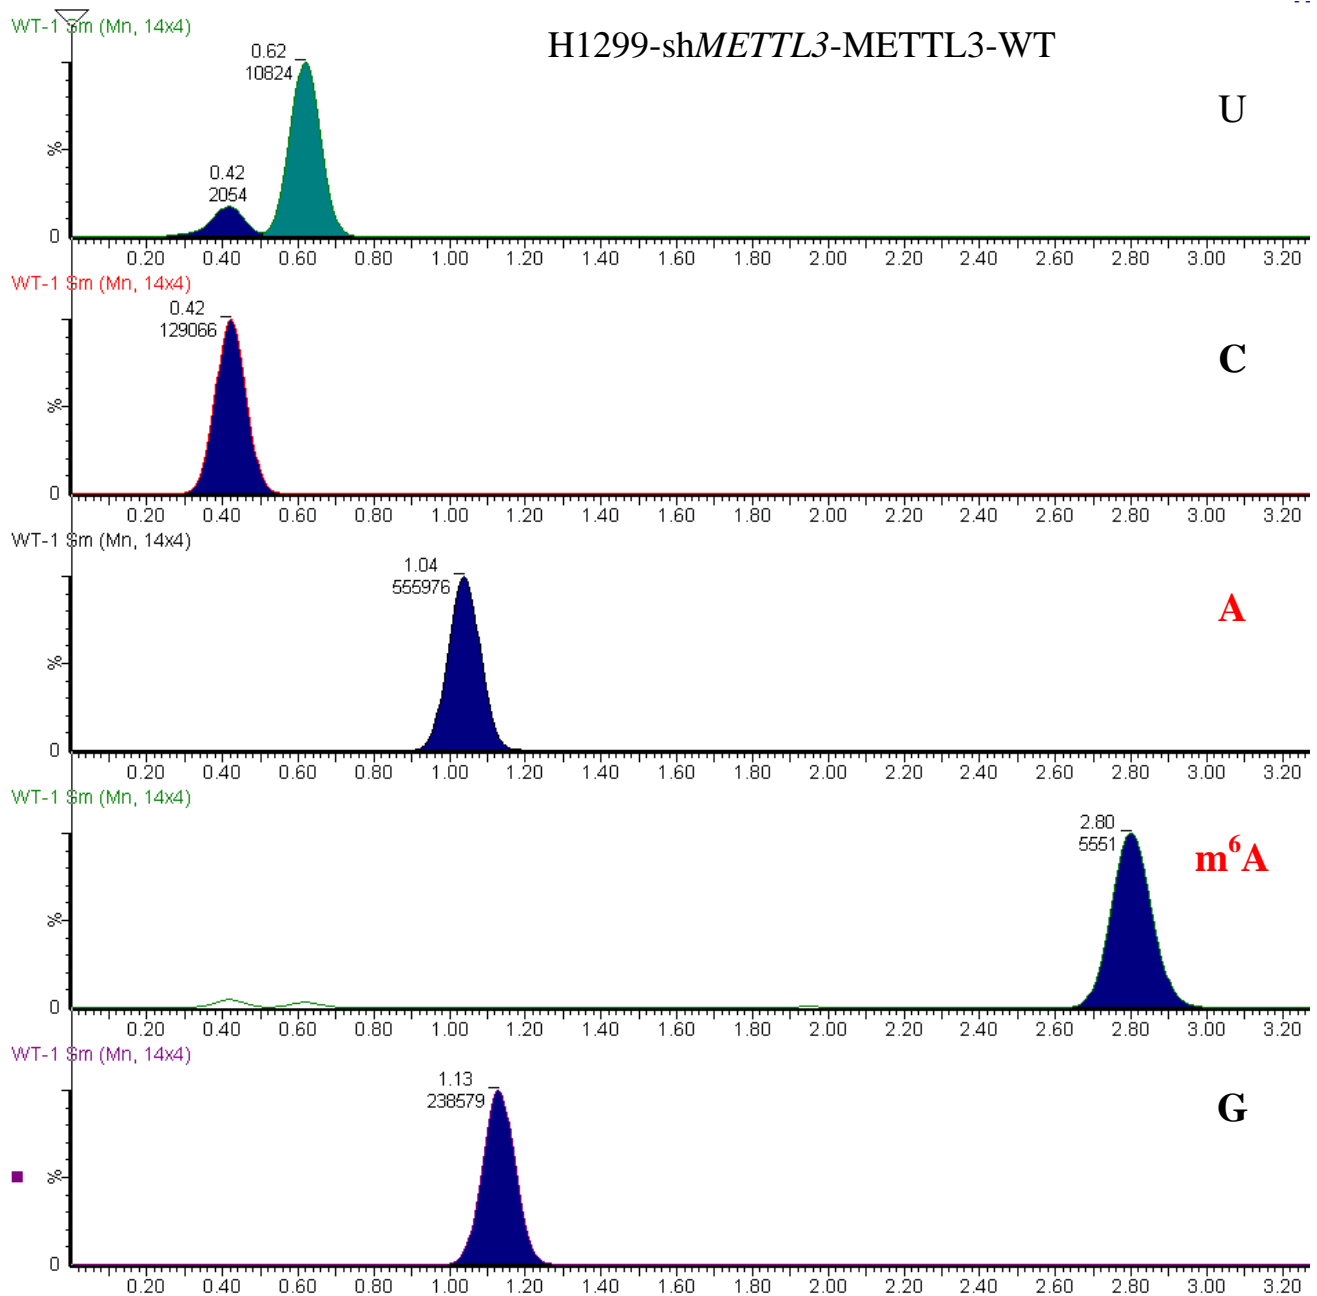

Figure S4

C

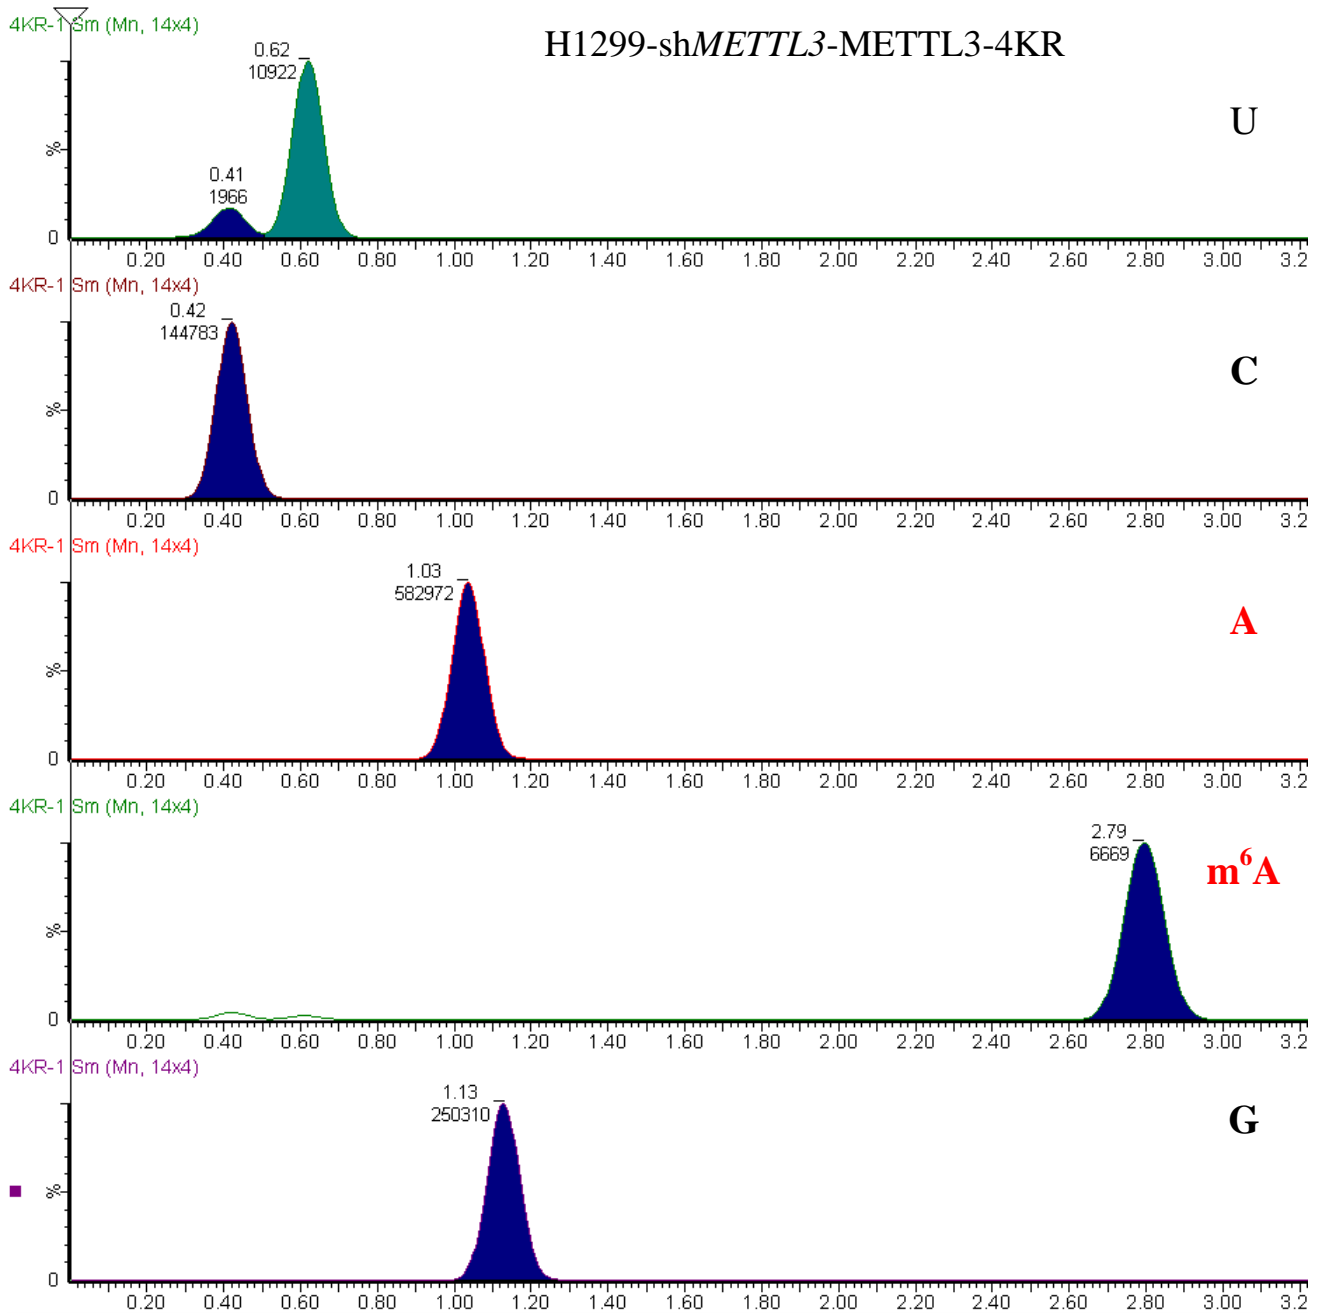

**A**

RNA probe Seq1: ACGAGUCCUGGACUGAAACGGACUUGC  
 Seq2: ACGAGUCCUGGAUUGAAACGGAUUUGC

**B**

|                         |   |   |   |
|-------------------------|---|---|---|
| Purified METTL3+METTL14 | - | + | + |
| RNA probe seq1          | + | - | + |

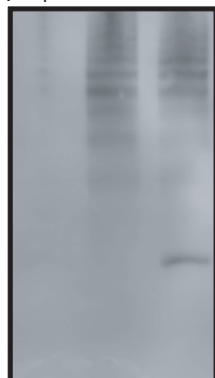

← m6A-RNA probe

IB: anti-m6A

**C**

Purified METTL3+METTL14

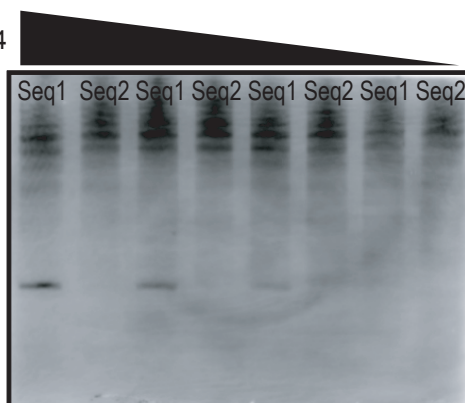

← m6A-RNA probe

IB: anti-m6A

**Table S1** (Related to Figure 6). Summary of the m<sup>6</sup>A-seq and RNA-seq reads

| Sample | Seq Type             | Total Reads | Aligned Reads       |
|--------|----------------------|-------------|---------------------|
| WT     | m <sup>6</sup> A-seq | 40,896,078  | 40,542,449 (99.13%) |
|        | RNA-seq              | 74,526,128  | 68,494,267(91.91%)  |
| 4KR    | m <sup>6</sup> A-seq | 44,910,228  | 44,520,205 (99.13%) |
|        | RNA-seq              | 73,850,942  | 68,607,238(92.90%)  |



**Table S2.** List of 90 genes that exhibited significant changes in both the m<sup>6</sup>A peak levels and the overall abundance of corresponding mRNA transcripts between METTL3-WT and METTL3-4KR re-expression.

| Gene       | Pattern    | m <sup>6</sup> A level change |   |       |           |   |     | mRNA abundance change |          |
|------------|------------|-------------------------------|---|-------|-----------|---|-----|-----------------------|----------|
|            |            | peak 1                        |   |       | peak 2    |   |     | Fold                  | p        |
|            |            | Fold                          | p | Loc   | Fold      | p | Loc |                       |          |
| HS3ST3A1   | Hypo-down  | 7.031E-05                     | 0 | 5UTR  | 0.0001563 | 0 | CDS | 0.3670427             | 5.00E-05 |
| KIAA1211   | Hypo-down  | 5.876E-05                     | 0 | CDS   | 0.0002103 | 0 | CDS | 0.6128063             | 1.71E-01 |
| ENTPD1     | Hypo-down  | 0.0002035                     | 0 | 3UTR  |           |   |     | 0.0597048             | 1.00E+00 |
| HIST2H2AA4 | Hypo-down  | 6.152E-05                     | 0 | stopC |           |   |     | 0.0751986             | 1.48E-01 |
| JSRP1      | Hypo-down  | 0.0002175                     | 0 | CDS   |           |   |     | 0.0983303             | 2.89E-01 |
| HIST2H4B   | Hypo-down  | 0.0001723                     | 0 | stopC |           |   |     | 0.186282              | 3.73E-02 |
| HIST2H2AA3 | Hypo-down  | 0.0001159                     | 0 | stopC |           |   |     | 0.2011606             | 1.86E-01 |
| RBL1       | Hypo-down  | 0.0002103                     | 0 | CDS   |           |   |     | 0.2507671             | 1.00E+00 |
| ZBED6      | Hypo-down  | 0.0001229                     | 0 | CDS   |           |   |     | 0.3324502             | 1.00E+00 |
| DLG2       | Hypo-down  | 0.0002089                     | 0 | stopC |           |   |     | 0.3951192             | 1.76E-02 |
| EFCAB6     | Hypo-down  | 0.0001687                     | 0 | CDS   |           |   |     | 0.4535615             | 1.00E+00 |
| COL11A1    | Hypo-down  | 0.000216                      | 0 | CDS   |           |   |     | 0.4679382             | 1.00E+00 |
| NAV3       | Hypo-down  | 0.0001347                     | 0 | CDS   |           |   |     | 0.4734651             | 8.37E-02 |
| AGAP8      | Hypo-down  | 0.0001358                     | 0 | CDS   |           |   |     | 0.5003581             | 7.25E-02 |
| HIST1H2AH  | Hypo-down  | 8.098E-05                     | 0 | CDS   |           |   |     | 0.5106175             | 6.24E-01 |
| AC096677.1 | Hypo-down  | 9.703E-05                     | 0 | stopC |           |   |     | 0.5858251             | 7.56E-01 |
| PLEKHA3    | Hypo-down  | 0.0001487                     | 0 | CDS   |           |   |     | 0.6308422             | 2.15E-01 |
| AARD       | Hypo-down  | 0.000219                      | 0 | stopC |           |   |     | 0.6457291             | 2.71E-01 |
| EXTL3      | Hypo-down  | 0.0001733                     | 0 | 3UTR  |           |   |     | 0.6654089             | 1.18E-01 |
| FCGBP      | Hypo-up    | 6.776E-05                     | 0 | CDS   | 0.0001196 | 0 | CDS | 1.5221463             | 3.99E-02 |
| PLCXD1     | Hypo-up    | 0.0001442                     | 0 | CDS   | 0.0001487 | 0 | CDS | 5.1047843             | 3.80E-02 |
| HSPG2      | Hypo-up    | 0.0001376                     | 0 | CDS   |           |   |     | 1.5190538             | 3.86E-02 |
| ALMS1      | Hypo-up    | 0.000113                      | 0 | CDS   |           |   |     | 1.5288162             | 2.22E-01 |
| COL18A1    | Hypo-up    | 0.0002107                     | 0 | CDS   |           |   |     | 1.5507456             | 5.65E-02 |
| KLHL11     | Hypo-up    | 0.0001876                     | 0 | CDS   |           |   |     | 1.5011623             | 1.00E+00 |
| FBN1       | Hypo-up    | 0.000152                      | 0 | CDS   |           |   |     | 1.6033907             | 3.59E-02 |
| TMEM185A   | Hypo-up    | 0.0001311                     | 0 | stopC |           |   |     | 1.641506              | 1.71E-01 |
| ABCA5      | Hypo-up    | 6.001E-05                     | 0 | CDS   |           |   |     | 1.6493185             | 2.27E-01 |
| ANKRD54    | Hypo-up    | 0.0002044                     | 0 | CDS   |           |   |     | 1.6611404             | 4.99E-01 |
| AGAP4      | Hypo-up    | 0.0002023                     | 0 | CDS   |           |   |     | 1.7345639             | 4.05E-02 |
| PCDHGB1    | Hypo-up    | 0.0001555                     | 0 | CDS   |           |   |     | 1.7589202             | 1.00E+00 |
| ZNF442     | Hypo-up    | 0.0002112                     | 0 | 5UTR  |           |   |     | 1.7611026             | 4.77E-02 |
| BMP8A      | Hypo-up    | 0.0002093                     | 0 | 3UTR  |           |   |     | 2.0041215             | 1.00E+00 |
| SHPK       | Hypo-up    | 0.0001948                     | 0 | 3UTR  |           |   |     | 2.0202726             | 1.20E-01 |
| CACNA2D1   | Hypo-up    | 0.0002195                     | 0 | 3UTR  |           |   |     | 2.0496392             | 1.05E-01 |
| GPR146     | Hypo-up    | 0.0001186                     | 0 | CDS   |           |   |     | 2.0747823             | 6.52E-01 |
| ATP6V1C2   | Hypo-up    | 0.0002126                     | 0 | 3UTR  |           |   |     | 2.1673317             | 6.83E-01 |
| GAGE1      | Hypo-up    | 0.0001832                     | 0 | CDS   |           |   |     | 2.2464392             | 5.00E-05 |
| FREM2      | Hypo-up    | 0.0002126                     | 0 | CDS   |           |   |     | 2.4535659             | 1.00E+00 |
| RASA4B     | Hyper-down | 7639.7                        | 0 | 5UTR  |           |   |     | 0.5724109             | 4.45E-01 |
| TUBB3      | Hyper-down | 15774.8                       | 0 | stopC |           |   |     | 0.6634511             | 7.55E-01 |
| C5orf42    | Hyper-down | 5243                          | 0 | CDS   | 5176.2    | 0 | CDS | 0.5908714             | 9.45E-02 |

|           |            |         |   |       |        |   |      |           |          |
|-----------|------------|---------|---|-------|--------|---|------|-----------|----------|
| GATSL2    | Hyper-down | 6455.7  | 0 | stopC | 4374.1 | 0 | 3UTR | 0.6356687 | 4.47E-01 |
| EGR1      | Hyper-down | 6904.4  | 0 | stopC | 5481.7 | 0 | CDS  | 0.6645423 | 1.73E-02 |
| GAGE2C    | Hyper-down | 8842.8  | 0 | 3UTR  |        |   |      | 0.1289318 | 5.00E-05 |
| PLXNB3    | Hyper-down | 4374.1  | 0 | CDS   |        |   |      | 0.2499012 | 1.00E+00 |
| CNOT6L    | Hyper-down | 9864.4  | 0 | CDS   |        |   |      | 0.3020732 | 1.50E-04 |
| GAGE2E    | Hyper-down | 5147.5  | 0 | CDS   |        |   |      | 0.3389654 | 1.00E+00 |
| APC2      | Hyper-down | 6197.9  | 0 | CDS   |        |   |      | 0.4183986 | 2.60E-01 |
| TREX2     | Hyper-down | 6455.7  | 0 | stopC |        |   |      | 0.4683081 | 5.69E-01 |
| ZNF649    | Hyper-down | 10045.8 | 0 | CDS   |        |   |      | 0.5413704 | 1.43E-01 |
| SOX4      | Hyper-down | 9864.4  | 0 | 3UTR  |        |   |      | 0.5811482 | 6.95E-03 |
| PTPRU     | Hyper-down | 9644.8  | 0 | CDS   |        |   |      | 0.5985846 | 1.00E+00 |
| PRKG2     | Hyper-down | 5472.2  | 0 | CDS   |        |   |      | 0.602919  | 1.00E+00 |
| HIST1H2AI | Hyper-down | 5424.5  | 0 | stopC |        |   |      | 0.6096635 | 4.12E-01 |
| S1PR2     | Hyper-down | 14705.4 | 0 | stopC |        |   |      | 0.6154877 | 7.59E-01 |
| PIANP     | Hyper-down | 4221.4  | 0 | CDS   |        |   |      | 0.6252664 | 9.92E-02 |
| POTEE     | Hyper-down | 3629.4  | 0 | CDS   |        |   |      | 0.6279576 | 1.00E+00 |
| CCDC142   | Hyper-down | 6217    | 0 | CDS   |        |   |      | 0.6335481 | 4.05E-01 |
| AKAP13    | Hyper-down | 5319.4  | 0 | CDS   |        |   |      | 0.645927  | 2.25E-01 |
| RASA4     | Hyper-up   | 8078.9  | 0 | 5UTR  |        |   |      | 3.1345319 | 7.10E-02 |
| GAGE2B    | Hyper-up   | 16958.8 | 0 | stopC | 4822.9 | 0 | CDS  | 1.5825916 | 1.38E-01 |
| RGPD5     | Hyper-up   | 3495.7  | 0 | 3UTR  | 3457.5 | 0 | 3UTR | 6.516196  | 9.50E-04 |
| GOLGA8J   | Hyper-up   | 7945.2  | 0 | 3UTR  |        |   |      | 1.5023355 | 1.00E+00 |
| PDP2      | Hyper-up   | 4192.7  | 0 | stopC |        |   |      | 1.5307503 | 9.59E-02 |
| ZBTB10    | Hyper-up   | 10485.1 | 0 | CDS   |        |   |      | 1.5419628 | 1.16E-02 |
| TAP2      | Hyper-up   | 11640.4 | 0 | 3UTR  |        |   |      | 1.5532155 | 6.08E-01 |
| PDE4C     | Hyper-up   | 12643   | 0 | stopC |        |   |      | 1.5638217 | 2.72E-01 |
| VAX1      | Hyper-up   | 4536.5  | 0 | 3UTR  |        |   |      | 1.5655125 | 2.28E-01 |
| TNC       | Hyper-up   | 12299.2 | 0 | CDS   |        |   |      | 1.5694641 | 1.00E+00 |
| KLF13     | Hyper-up   | 3791.7  | 0 | 3UTR  |        |   |      | 1.6166216 | 2.27E-01 |
| HIST4H4   | Hyper-up   | 6121.5  | 0 | stopC |        |   |      | 1.6531997 | 4.29E-01 |
| NEO1      | Hyper-up   | 9215.1  | 0 | 3UTR  |        |   |      | 1.7734959 | 9.80E-02 |
| ANK3      | Hyper-up   | 3390.7  | 0 | CDS   |        |   |      | 1.7910579 | 2.52E-01 |
| GNRH2     | Hyper-up   | 4479.2  | 0 | CDS   |        |   |      | 2.2374105 | 1.00E+00 |
| ZNF846    | Hyper-up   | 5453.1  | 0 | CDS   |        |   |      | 2.2731139 | 1.33E-02 |
| PTPRM     | Hyper-up   | 4851.6  | 0 | CDS   |        |   |      | 2.4359086 | 1.00E+00 |
| HIST1H1D  | Hyper-up   | 11258.5 | 0 | CDS   |        |   |      | 5.0422233 | 1.21E-01 |
| NBPF8     | Hyper-up   | 2970.5  | 0 | CDS   |        |   |      | 5.0456146 | 1.00E+00 |
| TXNDC2    | Hyper-up   | 8098    | 0 | CDS   |        |   |      | 5.4265302 | 6.47E-02 |
| MEI1      | Hyper-up   | 30326.5 | 0 | CDS   |        |   |      | 12.833653 | 1.00E+00 |
| PI16      | Hyper-up   | 11764.5 | 0 | 3UTR  |        |   |      | 14.719533 | 1.00E+00 |

(a). Fold, fold change; Loc, location; 3UTR, 3' untranslated region; 5UTR, 5' untranslated region; CDS, coding region; StopC, stop codon; p, p value.

(b). Hypo-down and Hypo-up refer to the gene has a significant decrease in at least one m6A peak and a significant decrease and increase, respectively, in the abundance of the mRNA transcript in H1299-shMETTL3-overexpressing METTL3-4KR compared to METTL3-WT; Hyper-down and Hyper-up refer to the gene has a significant increase in at least one m6A peak and a significant decrease and increase, respectively, in the abundance of the mRNA transcript in H1299-shMETTL3-overexpressing METTL3-4KR compared to METTL3-WT.
